# Supplementary material
Source: publisher figshare collection journal article supplement (https://acs.figshare.com/ndownloader/files/4851448)
Supplement: Supplementary file 1 [file 4851448]

## Supporting Information

### Photoreactivity of Metal-organic Frameworks in Aqueous Solutions: Metal Dependence of Reactive Oxygen Species Production

Kai Liu,<sup>†</sup> Yanxin Gao,<sup>†</sup> Jing Liu,<sup>‡</sup> Yifan Wen,<sup>†</sup> Yingcan Zhao,<sup>§</sup> Kunyang Zhang,<sup>†</sup> and  
Gang Yu<sup>†,\*</sup>

<sup>†</sup> School of Environment, Beijing Key Laboratory for Emerging Organic  
Contaminants Control, State Key Joint Laboratory of Environmental Simulation and  
Pollution Control, Tsinghua University, Beijing 100084, China

<sup>‡</sup> MOE Key Lab of Environmental Remediation and Ecosystem Health, College of  
Environmental and Resource Sciences, Zhejiang University, Hangzhou 310058,  
China

<sup>§</sup> Lyles School of Civil Engineering and Division of Environmental and Ecological  
Engineering, Purdue University, West Lafayette, Indiana 47907, United States

Summary:

Pages: 9

Tables: 2

Figures: 15

Equations: 2

**Table S1.** Components of simulated river water used.

| Anions    | Concentration (mg/L) |
|-----------|----------------------|
| Chloride  | 38.5                 |
| Phosphate | 1.1                  |
| Nitrate   | 39.4                 |
| Sulfate   | 53.2                 |

**Table S2.** Compounds detected after 5 h release of MIL-53(Fe) encapsulated diclofenac.

| Compounds                                 | CAS             | Structure | Retention<br>time<br>(min) | measured<br><i>m/z</i> | M-H                                                                | Error<br>(ppm) | Fragments<br>( <i>m/z</i> ) | Fragment<br>Structures | Predicted<br>formula<br>(fragments)                        |
|-------------------------------------------|-----------------|-----------|----------------------------|------------------------|--------------------------------------------------------------------|----------------|-----------------------------|------------------------|------------------------------------------------------------|
| 2-(8-Hydroxy-9H-carbazol-1-yl)acetic acid | 131023<br>-45-5 |           | 6.516                      | 240.0667               | C <sub>14</sub> H <sub>10</sub><br>NO <sub>3</sub>                 | 0.3            | 196.0771                    |                        | C <sub>13</sub> H <sub>11</sub> NO<br>(1.6)                |
| 2-(9H-carbazol-1-yl)acetic acid           | 131023<br>-43-3 |           | 7.620                      | 224.0716               | C <sub>14</sub> H <sub>11</sub><br>NO <sub>2</sub>                 | -0.5           | 180.0824                    |                        | C <sub>13</sub> H <sub>11</sub> N<br>(2.9)                 |
| 2-(8-chloro-9H-carbazol-1-yl)acetic acid  | 131023<br>-44-4 |           | 8.811                      | 258.0325               | C <sub>14</sub> H <sub>10</sub><br>NO <sub>2</sub> Cl              | -0.9           | 214.0431                    |                        | C <sub>13</sub> H <sub>10</sub> NCl<br>(0.9)               |
| Diclofenac                                | 15307-<br>79-6  |           | 9.767                      | 294.0091               | C <sub>14</sub> H <sub>10</sub><br>NO <sub>2</sub> Cl <sub>2</sub> | -1.0           | 250.0195                    |                        | C <sub>13</sub> H <sub>11</sub> NCl <sub>2</sub><br>(-0.3) |

**Figure S1.** PXRD patterns of as-synthesized isorecticular MIL-53s.

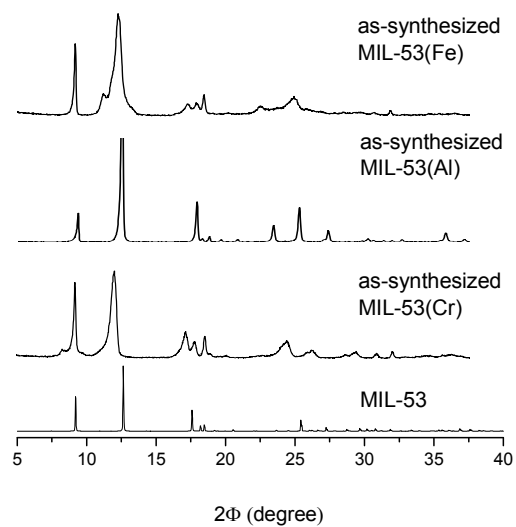

**Figure S2.** SEM of as-synthesized MIL-53(Cr) (left), MIL-53(Al) (middle), and MIL-53(Fe) (right).

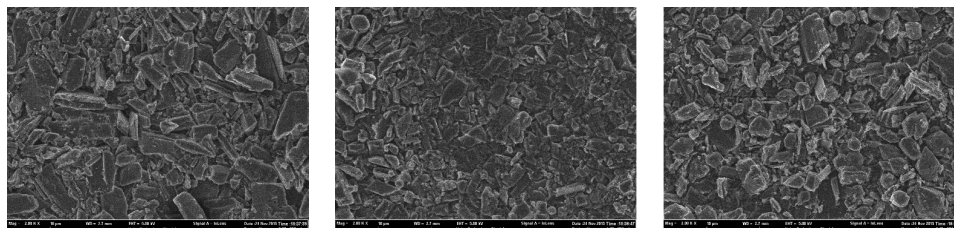

**Figure S3.** PXRD of different MIL-53s immersed in buffered mili-Q water at pH 7.0 and exposed to sunlight irradiation.

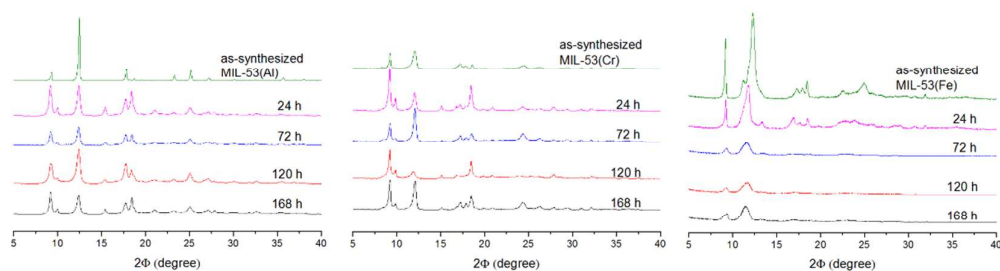

**Figure S4.** PXRD of different MIL-53s immersed in buffered mili-Q water at pH 7.0 and exposed to lamp irradiation.

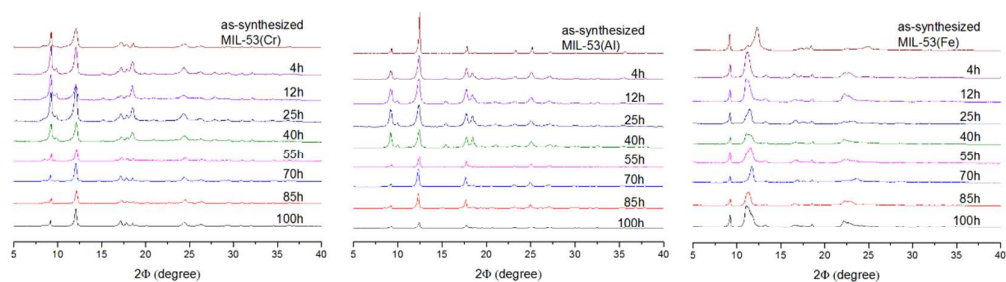

**Figure S5.** Evidence of  $^1\text{O}_2$  production by FFA (0.2 mM) reduction at pH 7.0 under sunlight irradiation at the presence of MIL-53(Cr) ( $\square$ ), MIL-53(Al) ( $\circ$ ), MIL-53(Fe) ( $\diamond$ ), and FFA alone (+)

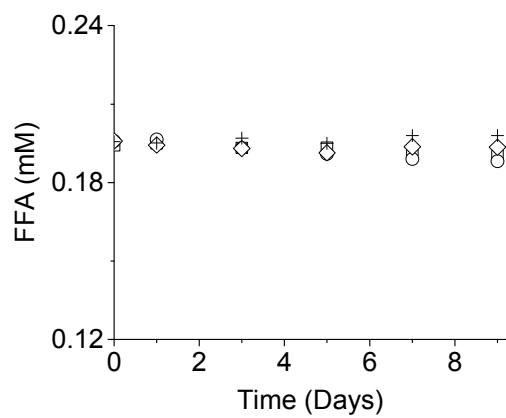

**Figure S6.**  $\text{O}_2^{\cdot -}$  formation detected by  $\text{NBT}^{2+}$  (0.2 mM) reduction at pH 7.0 under sunlight irradiation at the presence of MIL-53(Cr) ( $\square$ ), MIL-53(Al) ( $\circ$ ), MIL-53(Fe) ( $\diamond$ ), and  $\text{NBT}^{2+}$  alone (+).

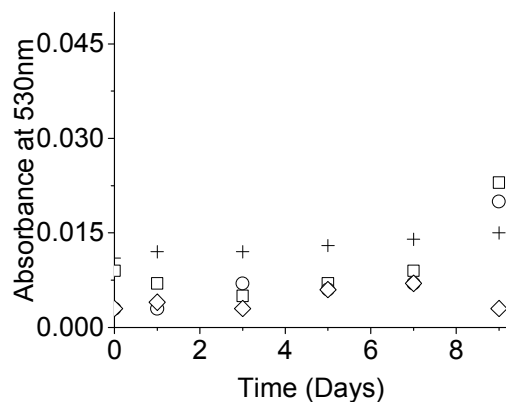

**Figure S7.**  $\cdot\text{OH}$  formation detected by *p*CBA (5  $\mu\text{M}$ ) reduction at pH 7.0 under sunlight irradiation at the presence of 10 mg/L solution of MIL-53(Cr) ( $\square$ ), MIL-53(Al) ( $\circ$ ), MIL-53(Fe) ( $\diamond$ ), and *p*CBA alone (+).

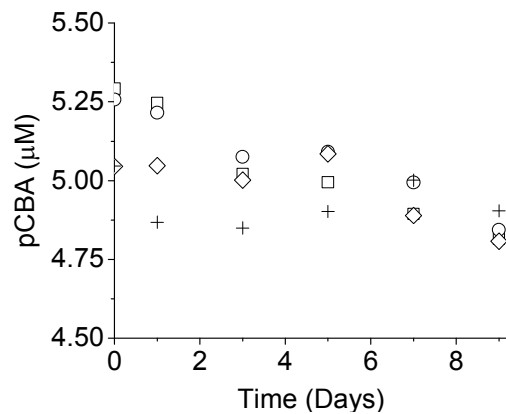

**Figure S8.** Adsorption kinetics of diclofenac on MIL-53(Fe) at pH 7.0.

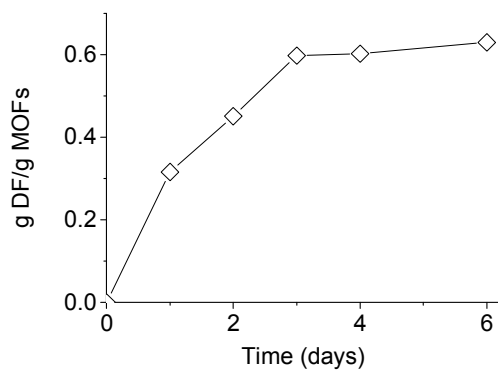

**Figure S9.** HPLC analysis of blank sample (diclofenac solution without MOFs) irradiated under lamp at predetermined time.

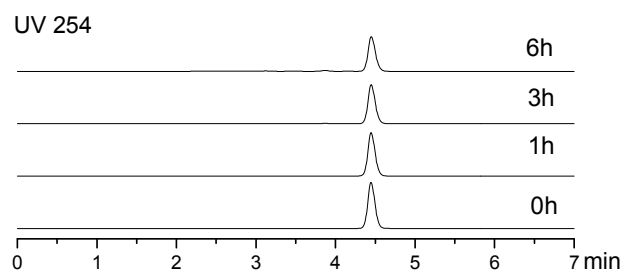

**Figure S10.** Diclofenac delivery and subsequent transformation by MIL-53(Fe) at the presence of lamp irradiation at pH 7.0.

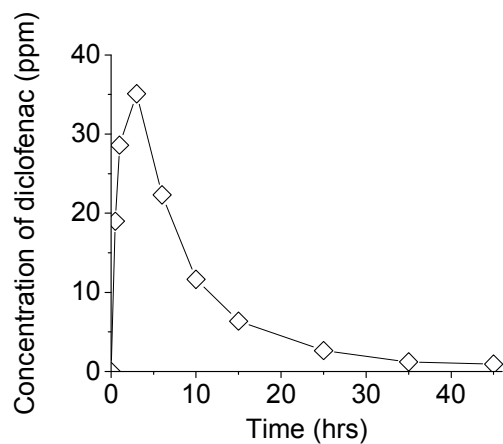

**Figure S11.** Proposed MIL-53(Fe) encapsulated diclofenac transformation pathway.

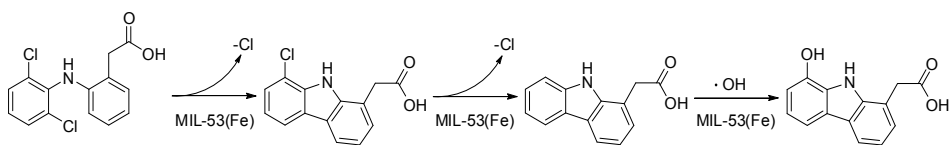

**Figure S12.** Mass spectrum of transformation product

2-(8-Hydroxy-9H-carbazol-1-yl)acetic acid released from MIL-53(Fe) encapsulated diclofenac, analyzed by Q-TOF LC/MS (ESI-)

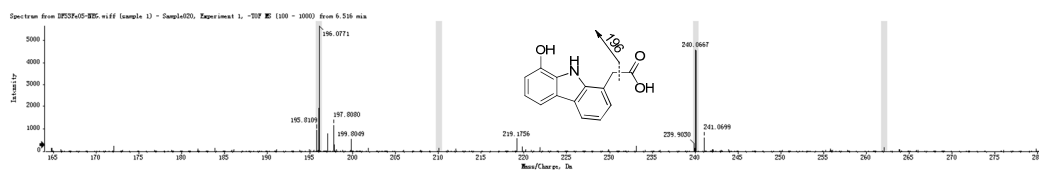

**Figure S13.** Mass spectrum of transformation product 2-(9H-carbazol-1-yl)acetic acid released from MIL-53(Fe) encapsulated diclofenac, analyzed by Q-TOF LC/MS (ESI-)

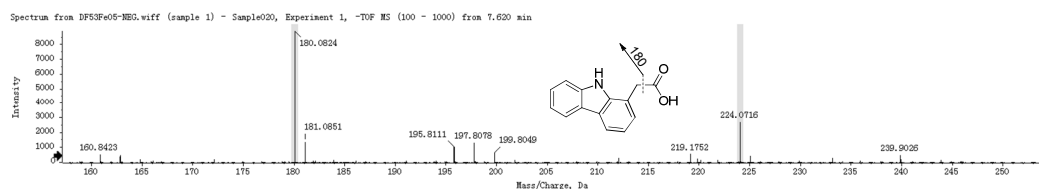

**Figure S14.** Mass spectrum of transformation product 2-(8-chloro-9H-carbazol-1-yl)acetic acid released from MIL-53(Fe) encapsulated diclofenac, analyzed by Q-TOF LC/MS (ESI-)

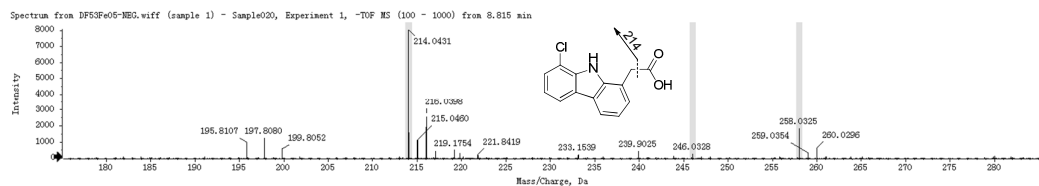

**Figure S15.** Mass spectrum of diclofenac released from MIL-53(Fe) encapsulated diclofenac, analyzed by Q-TOF LC/MS (ESI-)

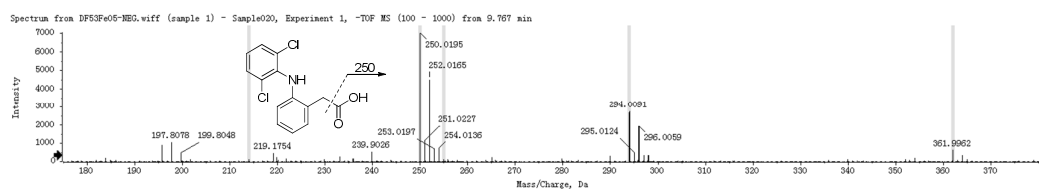



## ROS Measurements

### <sup>1</sup>O<sub>2</sub> Measurement

In accordance to previous literature,<sup>1</sup> the steady-state concentration of <sup>1</sup>O<sub>2</sub> is measured by eq S1:

$$\begin{aligned} -\frac{d[FFA]}{dt} &= k_r [^1O_2]_{ss} [FFA] \\ -\frac{d[FFA]}{dt} &= k_{ex} [FFA] \\ [^1O_2]_{ss} &= \frac{k_{ex}}{k_r} \end{aligned} \quad (S1)$$

where  $k_{ex}$  is the pseudo-first-order rate constant derived from the experiment, and  $k_r$  is  $1.2 \times 10^8 \text{ M}^{-1} \text{ s}^{-1}$ .

### ·OH Measurement

Due to the low concentration of pCBA used (5 μM), the reaction between pCBA and hydroxyl radical ·OH appears pseudo-first-order (Figure 3). In accordance to the previous literature,<sup>1</sup> the steady-state concentration of ·OH is measured by rate law that is analogous to eq S1:

$$\begin{aligned} -\frac{d[pCBA]}{dt} &= k_r [\cdot OH]_{ss} [pCBA] \\ -\frac{d[pCBA]}{dt} &= k_{ex} [pCBA] \\ [\cdot OH]_{ss} &= \frac{k_{ex}}{k_{pCBA}} \end{aligned} \quad (S2)$$

where  $k_{ex}$  is the pseudo-first-order rate constant derived from the experiment, and  $k_r$  is  $5.2 \times 10^9 \text{ M}^{-1} \text{ s}^{-1}$ .

### **Literature Cited**

- (1) Chen, C.-Y.; Jafvert, C. T., Photoreactivity of Carboxylated Single-Walled Carbon Nanotubes in Sunlight: Reactive Oxygen Species Production in Water. *Environmental Science & Technology* **2010**, *44*, (17), 6674-6679.
